# Supplementary material for: Nutrient Composition of Popularly Consumed African and Caribbean Foods in The UK
Source: MDPI journal article supplement (doi:10.3390/foods8100500), 2019-10-15
Supplement: s1 [file s1]

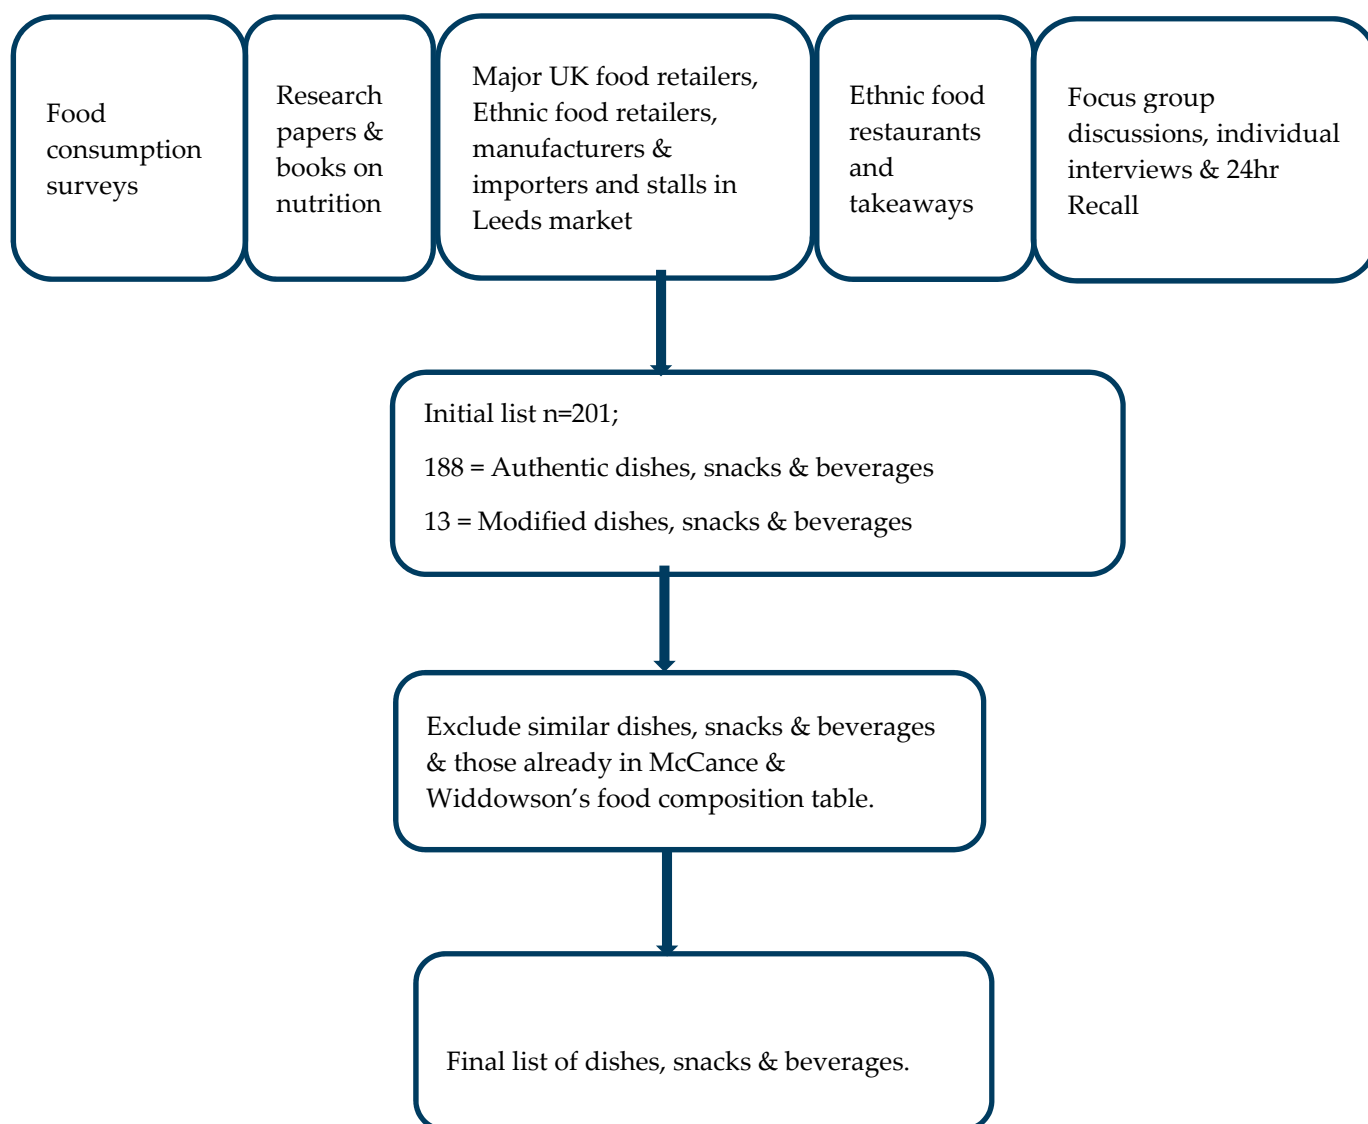

**Figure 1** Stages in the prioritisation of popular dishes, snacks and beverages.

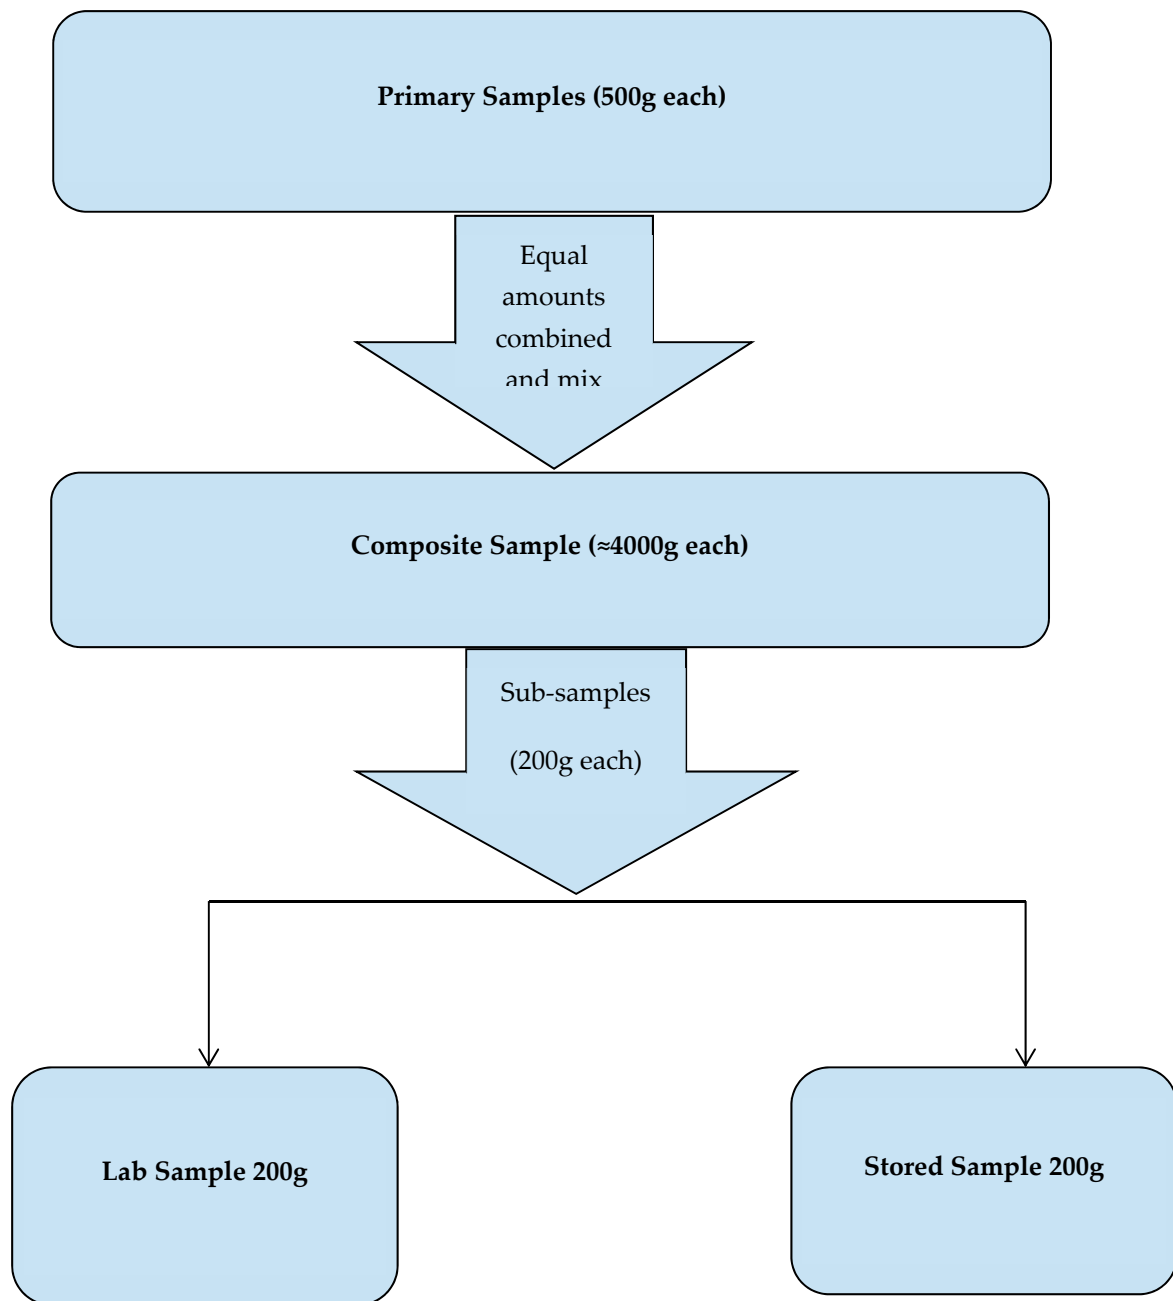

**Figure 2** Composite samples preparation protocol

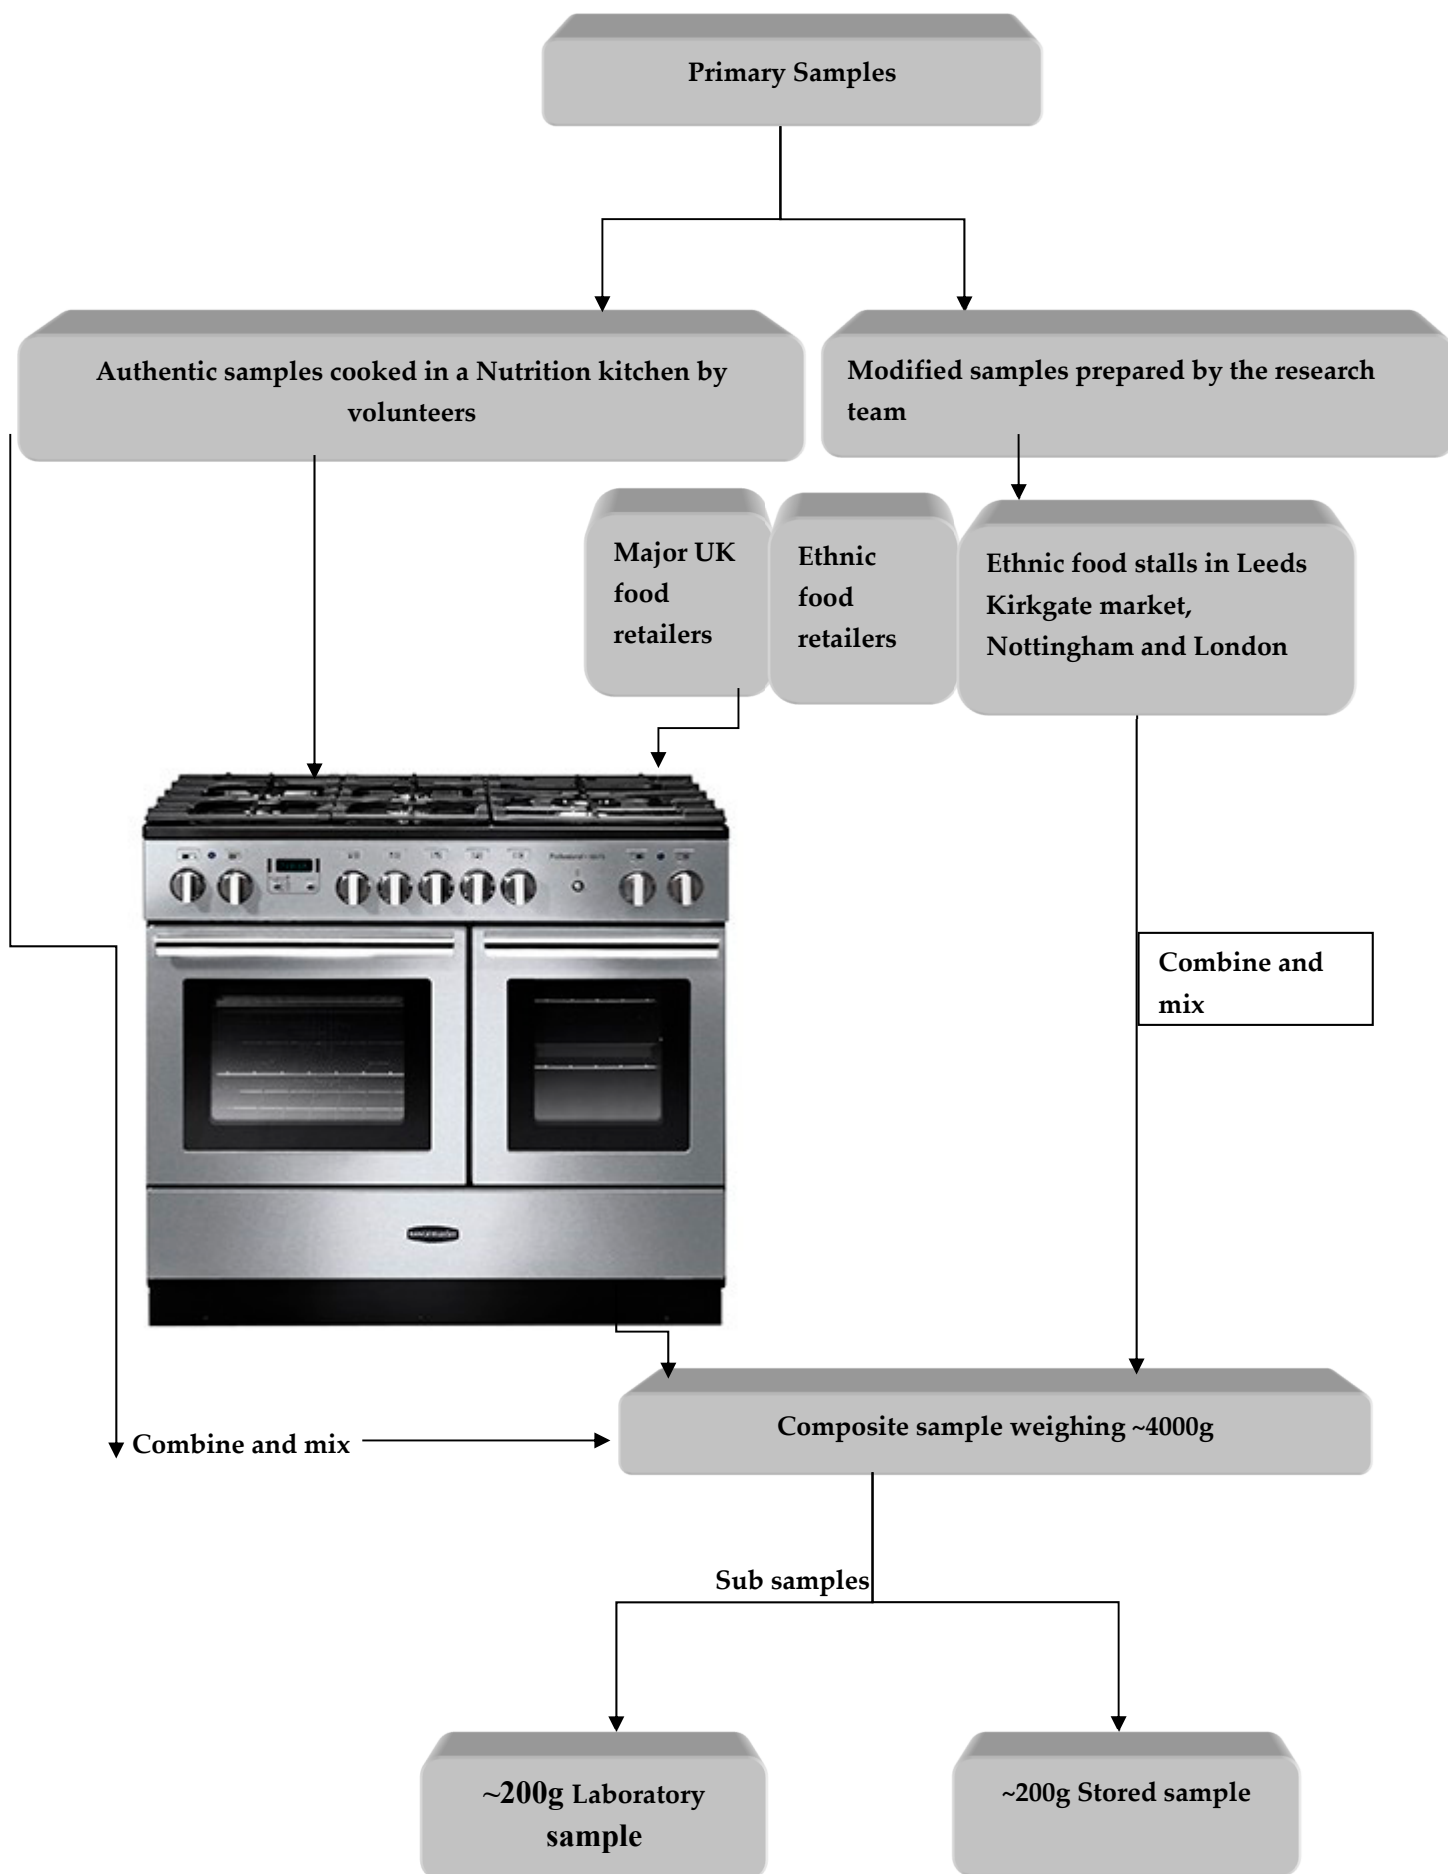

**Figure 3** Stages in the preparation of composite samples
